# Supplementary material
Source: publisher site journal article supplement (https://www.dovepress.com/article/507315)
Supplement: Supplementary file 1 [file get_supplementary_file.php]

**Supporting information**

**Preparation and characterization of Mitochondrial-targeted nitronyl nitroxide loaded PLGA nanoparticles for** **brain injury induced by hypobaric hypixia in mice**

Qingyue Da1,2, Min Xu3,4, Yiting Tian2, Huiping Ma2, Haibo Wang3*, Linlin Jing1,2*

1 Department of Pharmacy, The First Affiliated Hospital of Xi’an Jiaotong University, Xi’an 710061, China

2 Department of Pharmacy, The 940th Hospital of Joint Logistics Support force of PLA, Lanzhou, Gansu, 730050, China.

3 Department of Chemistry, School of Pharmacy, The Air Force Medical University, Xi’an 710032, China

4 The Third Stationed Outpatient Department, General Hospital of Central Theater Command, Wuhan 430070, China

**Correspondence**

**Linlin Jing**, Department of Pharmacy, The First Affiliated Hospital of Xi'an Jiaotong University, NO.277 Yanta West Road, Yanta District, Xi’an, Shaanxi, 710061, People’s Republic of China. Tel +86-029-85323537, E-mail address: jinglinlin@xjtufh.edu.cn

**Haibo Wang**, Department of Chemistry, School of Pharmacy, The Air Force Medical University, No.169, Changle West Road, Xi'an, Shaanxi, 710032, People’s Republic of China. Tel +86-029-84774473, E-mail address: haibo7691@fmmu.edu.cn.

**1. Material and method**

#### 1.1 Chemical Materials

Polyvinyl alcohol (PVA) was purchased from Chengdu Kelong Chemical Co.,Ltd.(Chengdu, China). D-α-Tocopherol polyethylene glycol succinate (TPGS) was purchased from Beijing Solarbio Science & Technology Co., Ltd. (Beijing, China)

#### 1.2 Single-Factor Experiments of TPP-C6-HPN@PLGA-NPs

#### Test for stabilizer

The organic phase was composed of PLGA (10 mg/mL), TPP-C6-HPN (1 mg/mL) and CH2Cl2, which was added dropwise into the water phase included stabilizer (as shown in Table S1), then the mixture was emulsified using ultraprobe sonicator at 200 W for 5 min in an ice bath. The the ratio of the aqueous phase to the oil phase was 10:1. Other processes were same as the method described in the manuscript. The experimental responses measured included particle size, PDI and zeta Potential.

#### Test for the contents of stabilizer

The organic phase was composed of PLGA (10 mg/mL), TPP-C6-HPN (1 mg/mL) and CH2Cl2, which was added dropwise into the water phase included different concentration of P188 (as shown in Table S2) and 0.1% SC, then the mixture was emulsified using ultraprobe sonicator at 200 W for 5 min in an ice bath. The the ratio of the aqueous phase to the oil phase was 10:1. Other processes were same as the method described in the manuscript. The experimental responses measured included particle size, PDI, zeta potential, encapsulation efficiency (EE), and drug loading (DL).

#### Test for the drug-load ratios

The organic phase was composed of different ratio of PLGA and TPP-C6-HPN in CH2Cl2 (as shown in Table S3), which was added dropwise into the water phase included 0.5% P188 and 0.1%SC, then the mixture was emulsified using ultraprobe sonicator at 200 W for 5 min in an ice bath. The the ratio of the aqueous phase to the oil phase was 10:1. Other processes were same as the method described in the manuscript. The experimental responses measured included particle size, PDI, zeta potential, EE, and DL.

#### Test for the oil-water ratios

The organic phase was composed of PLGA (10 mg/mL), TPP-C6-HPN (1 mg/mL) and CH2Cl2, which was added dropwise into the water phase included 0.5% P188 and 0.1% SC, then the mixture was emulsified using ultraprobe sonicator at 200 W for 90 s in an ice bath. The the ratio of the aqueous phase to the oil phase was set as shown in Table S4) Other processes were same as the method described in the manuscript. The experimental responses measured included particle size, PDI, zeta potential, EE, and DL.

#### Test for the ultrasonic power

The organic phase was composed of PLGA (10 mg/mL), TPP-C6-HPN (1 mg/mL) and CH2Cl2, which was added dropwise into the water phase included 0.5% P188 and 0.1% SC, then the mixture was emulsified using ultraprobe sonicator at 150, 200, 250, and 300 W, respectively, for 90 s in an ice bath. The the ratio of the aqueous phase to the oil phase was set as 10:1 Other processes were same as the method described in the manuscript. The experimental responses measured included particle size, PDI, zeta Potential, EE, and DL.

#### Test for the ultrasonic time

The organic phase was composed of PLGA (10 mg/mL), TPP-C6-HPN (1 mg/mL) and CH2Cl2, which was added dropwise into the water phase included 0.5% P188 and 0.1% SC, then the mixture was emulsified using ultraprobe sonicator at 200 for 3,5,7, and 10 min, respectively, in an ice bath. The the ratio of the aqueous phase to the oil phase was set as 10:1. Other processes were same as the method described in the manuscript. The experimental responses measured included particle size, PDI, zeta potential, EE, and DL.

#### 1.3 Preparation of CY5.5@PLGA-NPs

The organic phase was composed of PLGA (10 mg/mL), CY5.5 (0.2 mg/mL) in 1 ml CH2Cl2, which was added dropwise into the water phase included 0.3% P188 and 0.1% SC, then the mixture was emulsified using ultraprobe sonicator at 200 for 5 min in an ice bath. The the ratio of the aqueous phase to the oil phase was set as 10:1. Other processes were same as the the method described in the manuscript. The particle size, PDI and zeta potential were detected.

#### 2. Results

#### 2.1 Characterization of TPP-C6-HPN

**Figure S1** FTIR Spectra of TPP-C6-HPN


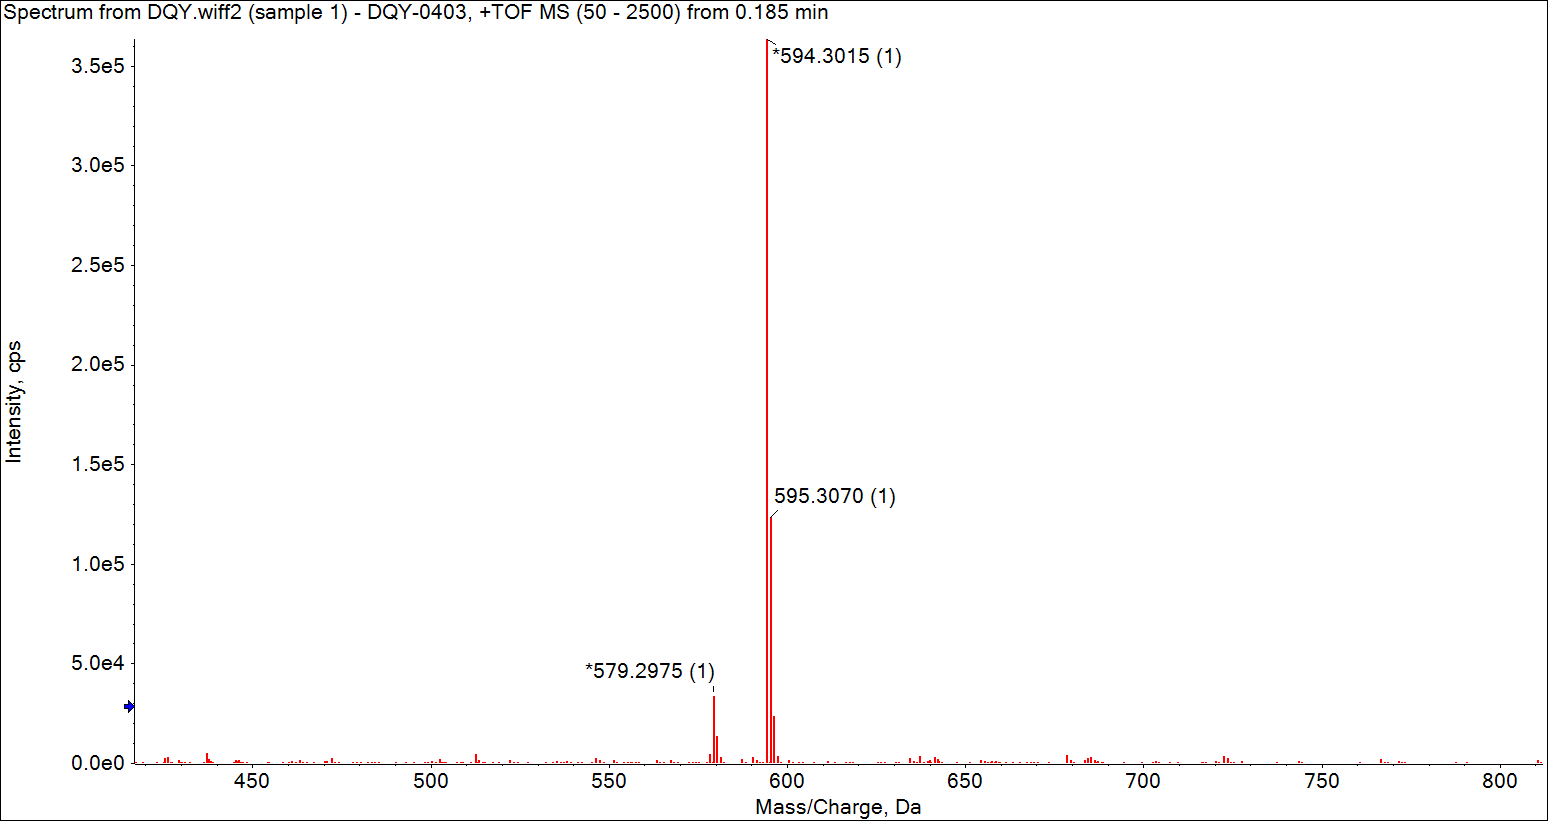


**Figure S2** HRMS of TPP-C6-HPN


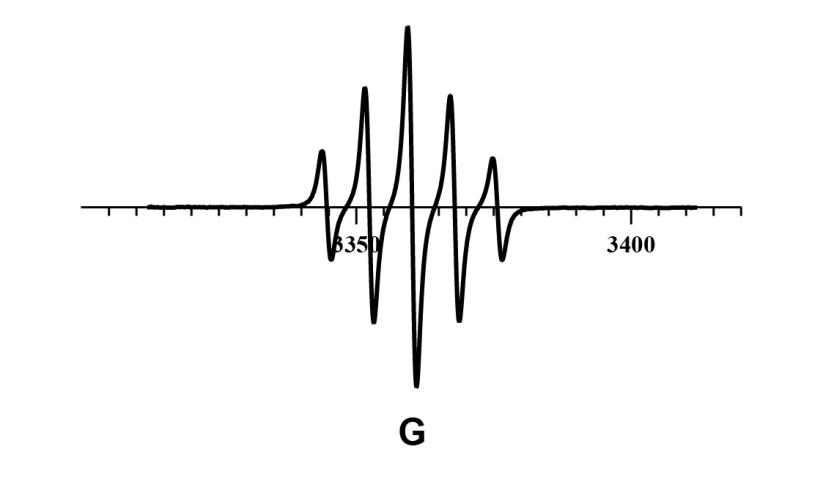


**Figure S3** ESR of TPP-C6-HPN

**2.2 Determination of the TPP-C6-HPN content**

**Specificity of the TPP-C6-HPN**


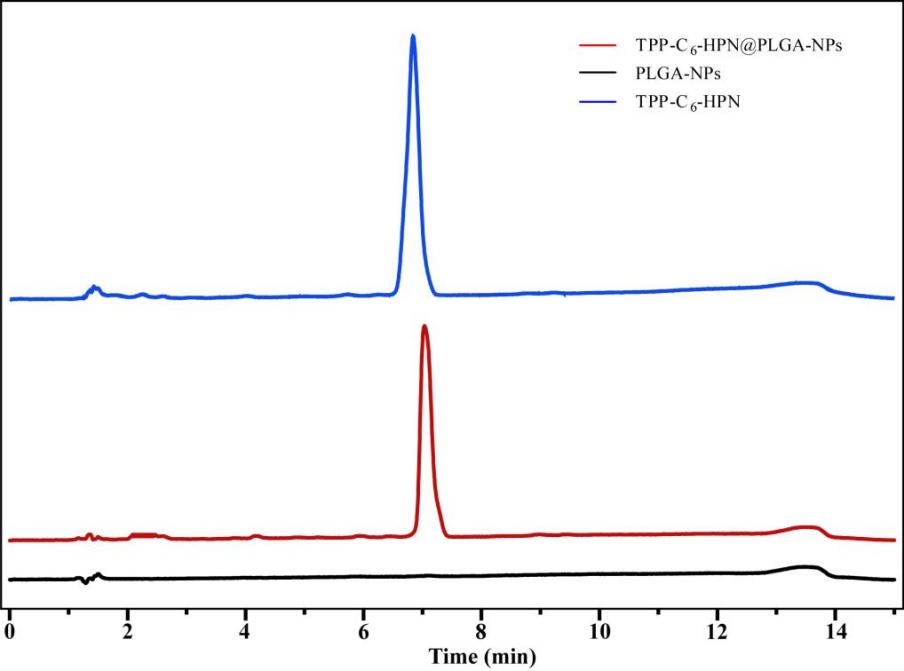


**Figure S4** Displays the chromatography of of TPP-C6-HPN, TPP-C6-HPN@PLGA-NPs, and PLGA-NPs

**Effect of stabilizer on the characteristics of TPP-C6-HPN@PLGA-NPs**

As shown in Table S1, P188 contributes more to the reduction of potential and PDI, while SC contributes to the reduction of particle size. The effect is more balanced when the two are mixed.

**Table** S1 Effect of stabilizer on the characteristics of TPP-C6-HPN@PLGA-NPs (± s, n=3)

| Stabilizer | Particle Size (nm) | PDI | Zeta Potential (mV) |
| --- | --- | --- | --- |
| 1% PVA | 367.75 ± 9.62 | 0.276 ± 0.10 | -4.31 ± 0.12 |
| 0.5% P188 | 213.59 ± 5.48 | 0.094 ± 0.10 | -18.99 ± 0.21 |
| 0.5% TPGS | 258.68 ± 0.05 | 0.221 ± 0.01 | 3.39 ± 2.02 |
| 0.5% SC | 35.11 ± 6.35 | 0.480 ± 0.04 | -5.36 ± 2.98 |
| 1% PVA+0.1% TPGS | 370.30 ± 3.23 | 0.192 ± 0.03 | -4.27 ± 1.06 |
| 1% PVA+0.1% SC | 328.39 ± 12.11 | 0.143 ± 0.06 | -3.64 ± 2.96 |
| 0.5% P188+0.1% TPGS | 256.29 ± 1.06 | 0.175 ± 0.10 | 2.10 ± 3.12 |
| 0.5% P188+0.1% SC | 140.29 ± 4.32 | 0.197 ± 0.03 | -22.37 ± 2.44 |

**Effect of concentration of P188 on the characteristics of TPP-C6-HPN@PLGA-NPs**

As shown in Table S2, the concentration of P188 had little effect on particle size, PDI and ζ-potential, but the EE and DL increased with the increase of concentration.

**Table** S2Effect of the concentration of P188 on the characteristics of TPP-C6-HPN@PLGA-NPs (± s, n=3)

| The contents of P188 (%) | Particle Size (nm) | PDI | Zeta Potential (mV) | EE (%) | DL (%) |
| --- | --- | --- | --- | --- | --- |
| 0.1 | 117.44 ± 0.56 | 0.293 ± 0.01 | -22.95 ± 2.04 | 81.20 ± 0.49 | 6.90 ± 0.05 |
| 0.2 | 121.45 ± 4.05 | 0.300 ± 0.01 | -25.39 ± 0.49 | 85.45 ± 1.81 | 6.51 ± 0.43 |
| 0.3 | 123.28 ± 1.81 | 0.310 ± 0.01 | -30.59 ± 2.66 | 89.32 ± 0.33 | 6.82 ± 0.26 |
| 0.4 | 127.62 ± 0.68 | 0.301 ± 0.01 | -38.31 ± 5.44 | 91.14 ± 0.97 | 7.11 ± 0.50 |
| 0.5 | 126.26 ± 3.37 | 0.301 ± 0.01 | -30.77 ± 6.93 | 91.80 ± 0.94 | 7.60 ± 0.47 |

**Effect of Drug-load ratios on the characteristics of TPP-C6-HPN@PLGA-NPs**

As shown in Table S3, Drug-load ratios can significantly affect the EE and DL. With the increase of drug loading ratio, the EE gradually increased, but the DL gradually decreased.

**Table** S3 Effect of Drug-load ratios on the characteristics of TPP-C6-HPN@PLGA-NPs (± s, n=3)

| Drug-load ratios | Particle Size (nm) | PDI | Zeta Potential (mV) | EE (%) | DL (%) |
| --- | --- | --- | --- | --- | --- |
| 1:5 | 135.6±6.31 | 0.100±0.04 | -19.20±3.02 | 62.3±4.48 | 8.8±1.11 |
| 1:8 | 135.1±8.14 | 0.300±0.07 | -24.30±6.94 | 83.0±5.54 | 8.4±0.77 |
| 1:10 | 126.3±3.37 | 0.300±0.01 | -30.8±6.93 | 91.8±0.94 | 7.6±0.47 |
| 1:15 | 152.5±3.38 | 0.200±0.05 | -43.8±12.65 | 95.1±0.10 | 5.3±0.45 |

**Effect of oil/water ratios on the characteristics of TPP-C6-HPN@PLGA-NPs**

As shown in Table S4, the oil/water ratio could significantly affect the particle size and DL. With the increase of the oil/water ratio, the particle size became smaller and the DL increased.

**Table** S4 Effect of oil-water ratios on the characteristics of TPP-C6-HPN@PLGA-NPs (± s, n=3)

| oil/water ratios | Particle Size (nm) | PDI | Zeta Potential (mV) | EE (%) | DL (%) |
| --- | --- | --- | --- | --- | --- |
| 1:6 | 162.60±8.29 | 0.199±0.03 | -37.52±4.59 | 79.22±0.56 | 6.38±0.07 |
| 1:8 | 157.54±9.01 | 0.212±0.02 | -30.71±3.86 | 88.95±2.32 | 6.67±0.49 |
| 1:10 | 123.28±1.81 | 0.310±0.01 | -30.59±2.66 | 92.69±2.25 | 6.91±0.24 |

**Effect of Ultrasonic power on the characteristics of TPP-C6-HPN@PLGA-NPs**

As shown in Table S5, the ultrasonic power had little effect on the properties of the NPs. When the ultrasonic power was set at 200 W, each index of the nanoparticles was better.

**Table** S5 Effect of ultrasonic power on the characteristics of TPP-C6-HPN@PLGA-NPs (± s, n=3)

| Ultrasonic power(W) | Particle Size (nm) | PDI | Zeta Potential (mV) | EE (%) | DL (%) |
| --- | --- | --- | --- | --- | --- |
| 150 | 125.6±4.68 | 0.222±0.044 | -27.72±2.30 | 74.80±4.46 | 6.38±0.26 |
| 200 | 108.00±2.24 | 0.194±0.010 | -25.08±3.01 | 73.92±3.33 | 6.75±0.13 |
| 250 | 113.87±3.67 | 0.195±0.004 | -27.48±1.83 | 70.53±4.67 | 6.39±0.60 |
| 300 | 119.73±4.12 | 0.192±0.019 | -27.17±1.22 | 68.59±2.73 | 5.98±0.49 |

**Effect of Ultrasonic time on the characteristics of TPP-C6-HPN@PLGA-NPs**

As shown in Table S6, with the increase of sonication time, the EE first increased and then decreased, and the particle size gradually decreased. When the ultrasound time was set as 5 min, the indexes of NPs were the best.

**Table S6** Effect of Ultrasonic time on the characteristics of TPP-C6-HPN@PLGA-NPs (± s, n=3)

| Ultrasonic time(min) | Particle Size (nm) | PDI | Zeta Potential (mV) | EE (%) | DL (%) |
| --- | --- | --- | --- | --- | --- |
| 3 | 140.37±25.58 | 0.193±0.07 | -29.85±5.82 | 82.06±3.21 | 6.48±0.35 |
| 5 | 113.87±10.16 | 0.199±0.02 | -29.63±2.78 | 87.41±0.95 | 7.17±0.12 |
| 7 | 104.55±5.98 | 0.215±0.01 | -25.31±1.00 | 74.09±1.91 | 5.98±0.11 |
| 10 | 108.00±3.65 | 0.247±0.05 | -24.95±2.17 | 76.40±2.23 | 6.08±0.13 |

**Limit of detection (LOD) and limit of quantitation (LOQ) of TPP-C6-HPN**

As shown in Table S7, the corresponding LOD and LOQ values of TPP-C6-HPN are 0.3 *μ*g/mL and 1.0 μg/mL, respectively.

**Table S7** LOD and LOQ of TPP-C6-HPN (n = 6)

| Concentration (μg/mL) | Peak area (mAU*s) | S/N |
| --- | --- | --- |
| 0.30 | 2.96 | 2.71 |
| 3.17 | 2.73 |
| 2.98 | 2.98 |
| 1.00 | 9.86 | 9.03 |
| 10.56 | 9.11 |
| 9.93 | 9.93 |

**The calibration curve of TPP-C6-HPN**


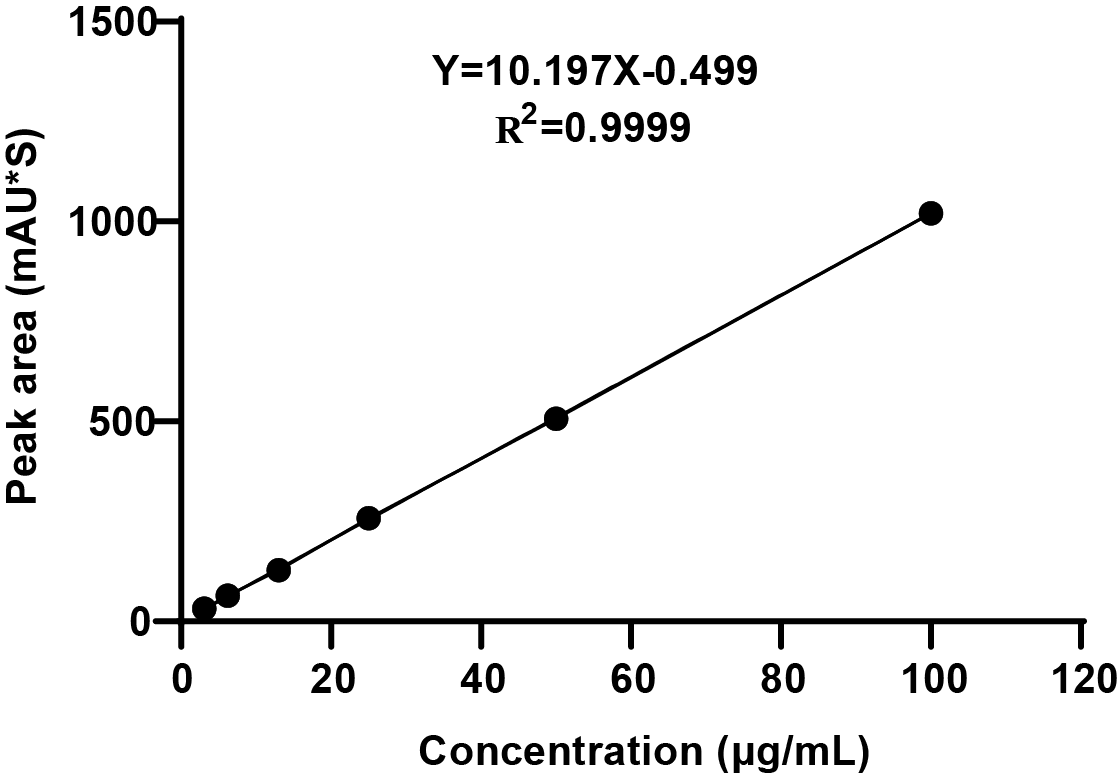


**Figure S5** TPP-C6-HPN calibration curve

**Accuracy and precision**

**Table** **S8** Accuracy and precision of TPP-C6-HPN (n = 6)

| Concentration (μg/mL) | Intra-day | | Inter-day | |
| --- | --- | --- | --- | --- |
| Precision (RSD %) | Accuracy  (EE (%) | Precision (RSD %) | Accuracy  (EE (%) |
| 6.25 | 1.94 | 0.49 | 0.42 | 0.30 |
| 25 | 0.99 | 0.80 | 1.43 | 1.07 |
| 100 | 0.82 | 0.86 | 2.01 | 1.18 |

**Stability**

**Table S9** The stability of TPP-C6-HPN (n=6)

| Concentration (μg/mL) | 24 h at RT | |
| --- | --- | --- |
| Precision (RSD %) | Accuracy (EE %) |
| 6.25 | 1.94 | 0.49 |
| 25 | 1.33 | 0.80 |
| 100 | 0.82 | 0.86 |

**2.3 Single-Factor Experiments of TPP-C6-HPN@PLGA-NPs**

**ANOVA for the Quadratic Model**

**Table S10** ANOVA for the Quadratic Model for the particle size (Y1)

| Source | Sum of squares | df | Mean square | F-value | p-value |  |
| --- | --- | --- | --- | --- | --- | --- |
| Model | 5602.22 | 9 | 622.47 | 5.56 | 0.0171 | significant |
| X1-WPLGA:WTPP-C6-HPN | 302.58 | 1 | 302.58 | 2.70 | 0.1443 |  |
| X2-Vwater:Voil | 1004.17 | 1 | 1004.17 | 8.96 | 0.0201 |  |
| X3-CP188 | 97.20 | 1 | 97.20 | 0.8674 | 0.3827 |  |
| X1X2 | 0.4298 | 1 | 0.4298 | 0.0038 | 0.9524 |  |
| X1X3 | 87.53 | 1 | 87.53 | 0.7811 | 0.4061 |  |
| X2X3 | 32.43 | 1 | 32.43 | 0.2894 | 0.6073 |  |
| X1² | 2910.39 | 1 | 2910.39 | 25.97 | 0.0014 |  |
| X1² | 1082.85 | 1 | 1082.85 | 9.66 | 0.0171 |  |
| X1² | 51.19 | 1 | 51.19 | 0.4568 | 0.5208 |  |
| Residual | 784.38 | 7 | 112.05 |  |  |  |
| Lack of Fit | 607.90 | 3 | 202.63 | 4.59 | 0.0875 | not significant |
| Pure Error | 176.48 | 4 | 44.12 |  |  |  |
| Cor Total | 6386.60 | 16 |  |  |  |  |

**Table S11** ANOVA for the Quadratic Model for the EE (Y2)

| Source | Sum of squares | df | Mean square | F-value | p-value |  |
| --- | --- | --- | --- | --- | --- | --- |
| Source | 434.14 | 9 | 48.24 | 5.19 | 0.0206 | significant |
| Model | 198.80 | 1 | 198.80 | 21.38 | 0.0024 |  |
| X1-WPLGA:WTPP-C6-HPN | 68.95 | 1 | 68.95 | 7.41 | 0.0296 |  |
| X2-Vwater:Voil | 0.8243 | 1 | 0.8243 | 0.0886 | 0.7746 |  |
| X3-CP188 | 7.97 | 1 | 7.97 | 0.8568 | 0.3854 |  |
| X1X2 | 17.75 | 1 | 17.75 | 1.91 | 0.2096 |  |
| X1X3 | 17.51 | 1 | 17.51 | 1.88 | 0.2123 |  |
| X2X3 | 104.10 | 1 | 104.10 | 11.19 | 0.0123 |  |
| X1² | 49.20 | 1 | 49.20 | 5.29 | 0.0550 |  |
| X1² | 1.58 | 1 | 1.58 | 0.1703 | 0.6922 |  |
| X1² | 65.10 | 7 | 9.30 |  |  |  |
| Residual | 38.32 | 3 | 12.77 | 1.91 | 0.2697 | not significant |
| Lack of Fit | 26.78 | 4 | 6.69 |  |  |  |
| Pure Error | 499.24 | 16 |  |  |  |  |

**Table S12** ANOVA for the Quadratic Model for the DL (Y3)

| Source | Sum of squares | df | Mean square | F-value | p-value |  |
| --- | --- | --- | --- | --- | --- | --- |
| Source | 10.21 | 9 | 1.13 | 10.58 | 0.0026 | significant |
| Model | 6.48 | 1 | 6.48 | 60.39 | 0.0001 |  |
| X1-WPLGA:WTPP-C6-HPN | 0.7111 | 1 | 0.7111 | 6.63 | 0.0368 |  |
| X2-Vwater:Voil | 0.0951 | 1 | 0.0951 | 0.8867 | 0.3777 |  |
| X3-CP188 | 0.0000 | 1 | 0.0000 | 0.0002 | 0.9904 |  |
| X1X2 | 0.3305 | 1 | 0.3305 | 3.08 | 0.1227 |  |
| X1X3 | 0.1892 | 1 | 0.1892 | 1.76 | 0.2259 |  |
| X2X3 | 0.3054 | 1 | 0.3054 | 2.85 | 0.1355 |  |
| X1² | 0.1178 | 1 | 0.1178 | 1.10 | 0.3296 |  |
| X1² | 0.1996 | 1 | 0.1996 | 1.86 | 0.2148 |  |
| X1² | 0.7511 | 7 | 0.1073 |  |  |  |
| Residual | 0.3568 | 3 | 0.1189 | 1.21 | 0.4147 | not significant |
| Lack of Fit | 0.3943 | 4 | 0.0986 |  |  |  |
| Pure Error | 10.96 | 16 |  |  |  |  |

**Drug release model of TPP-C6-HPN and TPP-C6-HPN@PLGA-NPs**

**Table S13** Fitting results of drug release kinetics equations for TPP-C6-HPN

|  | Release model | Fitting equation | R2 |
| --- | --- | --- | --- |
| TPP-HPN | Zero-order | Q = 31.27+3.72 * t | 0.5164 |
| First-order | Q = 89.60585*(1-exp (-0.4502*t)) | 0.99383 |
| Higuchi | Q = 22.25164*(t^0.5) + 11.33737 | 0.78166 |
| Ritger-Peppas | Q = 39.13173*(t^0.32219) | 0.85783 |

**Table S14** Fitting results of drug release kinetics equations for TPP-C6-HPN@PLGA-NPs

|  | Release model | Fitting equation | R2 |
| --- | --- | --- | --- |
| TPP-C6-HPN@PLGA-NPs | Zero-order | Q = 9.56+0.50*t | 0.69581 |
| First-order | Q = 42.53283*(1-exp(-0.1047*t)) | 0.99581 |
| Higuchi | Q = 5.54337*(t^0.5) + 0.3242 | 0.89142 |
| Ritger-Peppas | Q = 6.07776*(t^0.4687) | 0.97667 |

**2.4 Characterization of CY5.5@PLGA-NPs**

The measured particle size was 169.50 nm, the Zeta potential was -11.39 mV, and the PDI was 0.108.
